# Supplementary material
Source: MDPI journal article supplement (https://www.mdpi.com/2312-7481/9/3/65)
Supplement: s1 [file s1]

## Supporting Information

# A Strong Magnetic Field Alters the Activity and Selectivity of the CO<sub>2</sub>RR by Restraining C–C Coupling

Peichen Wang<sup>1</sup>, Yafei Qu<sup>1</sup>, Xiangfu Meng<sup>2</sup>, Jinwei Tu<sup>1</sup>, Wei Zheng<sup>1</sup>, Lin Hu<sup>2,\*</sup>  
and Qianwang Chen<sup>1,2,\*</sup>

<sup>1</sup> Hefei National Research Center for Physical Sciences at the Microscale and Department of Materials Science & Engineering, University of Science and Technology of China, Hefei 230026, China

<sup>2</sup> The High Magnetic Field Laboratory, Hefei Institutes of Physical Science, Chinese Academy of Sciences, Hefei 230031, China

\* Correspondence: hulin@hmfl.ac.cn (L.H.); cqw@ustc.edu.cn (Q.C.)

## Supplementary Figures and Tables

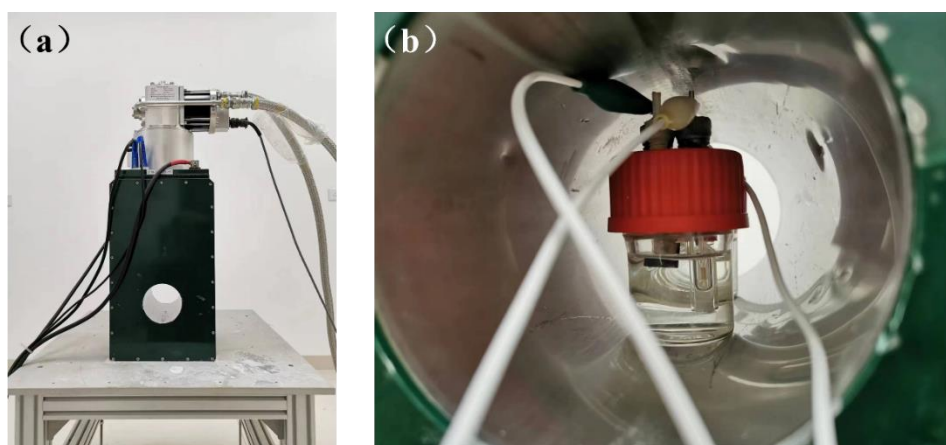

**Figure S1.** (a) The Installation photograph of mini cryogen free magnetic system. (b) the cavity and H-cell in the magnetic system.

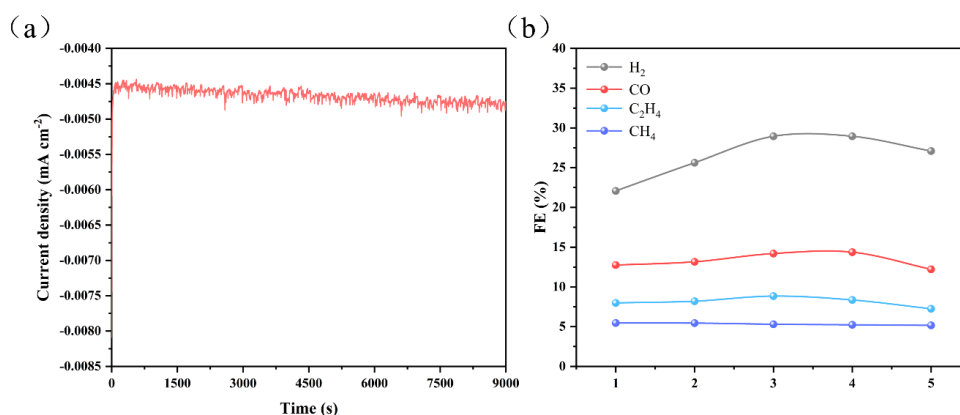

**Figure S2.** (a) 2.5-h plot of current density vs time at 1.0 V<sub>RHE</sub>. The gas phase products were collected every half hour, (b) the Faraday efficiency of H<sub>2</sub>, CO, C<sub>2</sub>H<sub>4</sub> and CH<sub>4</sub>. the test was performed in 0.1 M KHCO<sub>3</sub> solution.

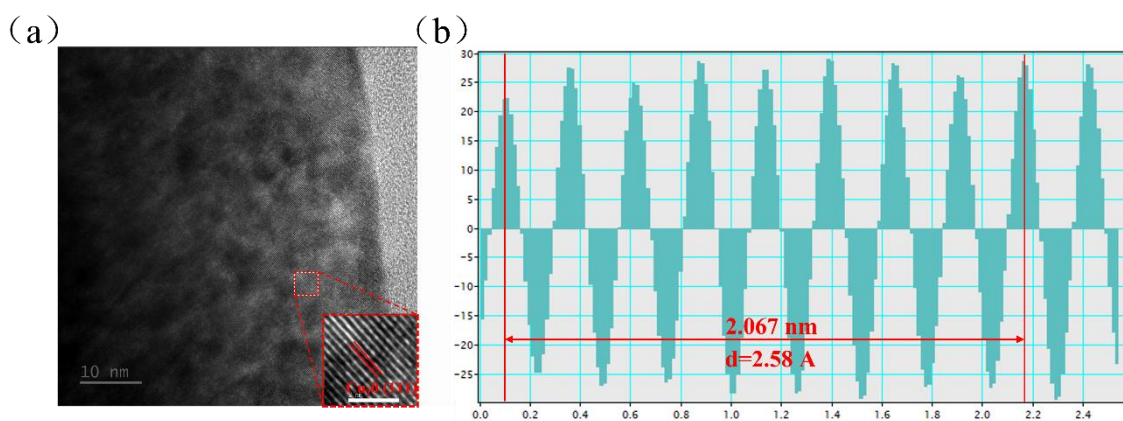

**Figure S3.** (a) HRTEM images of pretreated  $\text{Cu}_2\text{O}$  nanocubes. (b) the corresponding intensity profile for the line scan across the lattice fringes of  $\text{Cu}_2\text{O}$ .

**Table S1.** The Atomic Fraction of Cu, O and their atomic Error of as-prepared, pretreated and after-test  $\text{Cu}_2\text{O}$  catalyst.

|             | Atomic Fraction of Cu<br>(%) | Atomic Fraction of O<br>(%) | Atomic Error of Cu<br>(%) | Atomic Error of O<br>(%) |
|-------------|------------------------------|-----------------------------|---------------------------|--------------------------|
| As-prepared | 68.77                        | 31.23                       | 16.09                     | 6.01                     |
| Pretreated  | 68.82                        | 31.18                       | 16.10                     | 6.00                     |
| After test  | 71.02                        | 28.98                       | 16.80                     | 5.68                     |

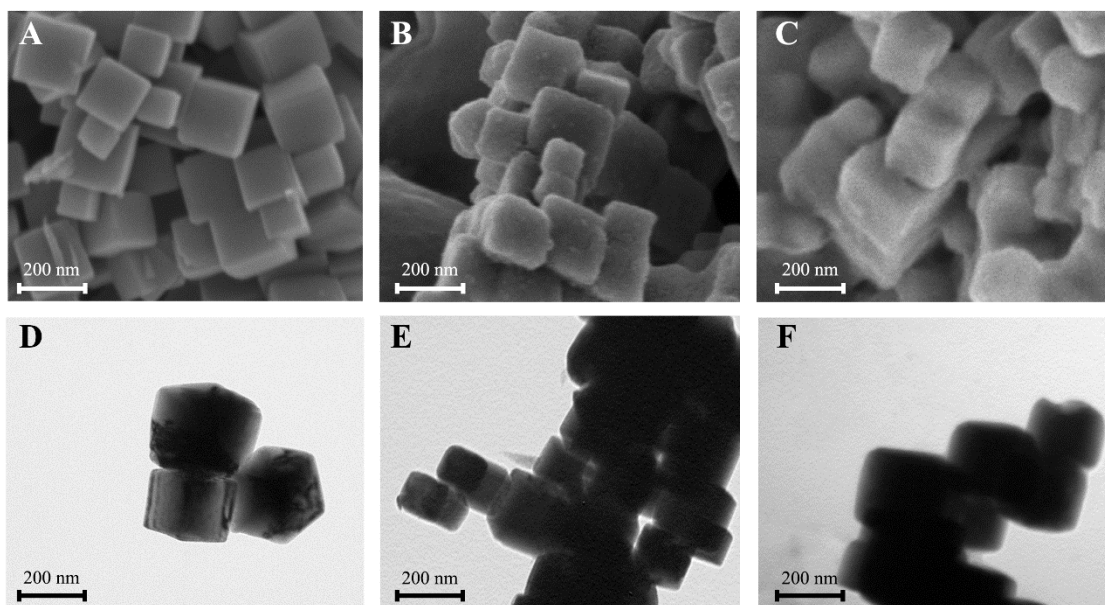

**Figure S4.** SEM images of (a) as-prepared Cu<sub>2</sub>O, (b) pretreated Cu<sub>2</sub>O and (c) Cu<sub>2</sub>O after test. TEM images of (d) as-prepared Cu<sub>2</sub>O, (e) pretreated Cu<sub>2</sub>O and (f) Cu<sub>2</sub>O after test.

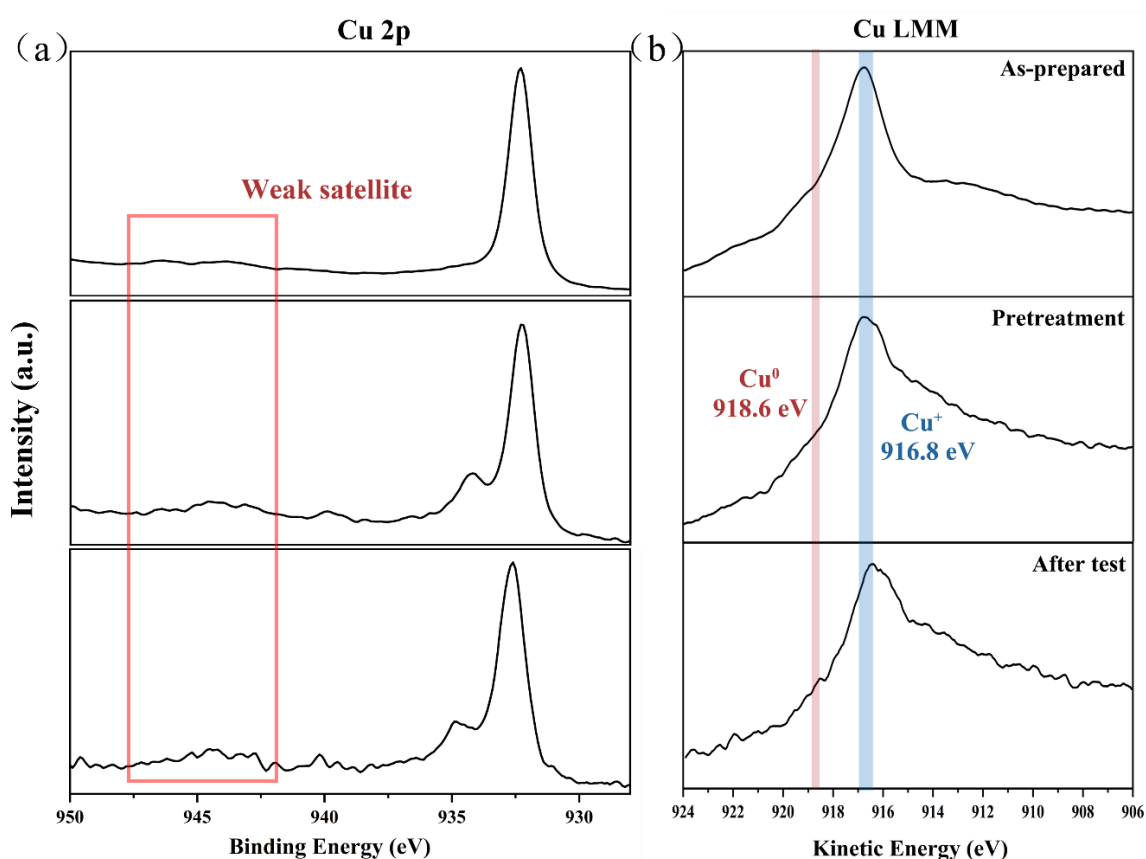

**Figure S5.** (a) XPS spectra of Cu 2p of the as-prepared, pretreated and after-test catalyst. The red frame shows the weak satellite peaks belonging to Cu<sub>2</sub>O. And the satellite peak increases gradually, indicating the formation of CuO. (b) XPS spectra of Cu LMM of the as-prepared, pretreated and after-test catalyst. The peak at 918.6 eV increases gradually, indicating that Cu<sub>2</sub>O is partially reduced to metallic Cu

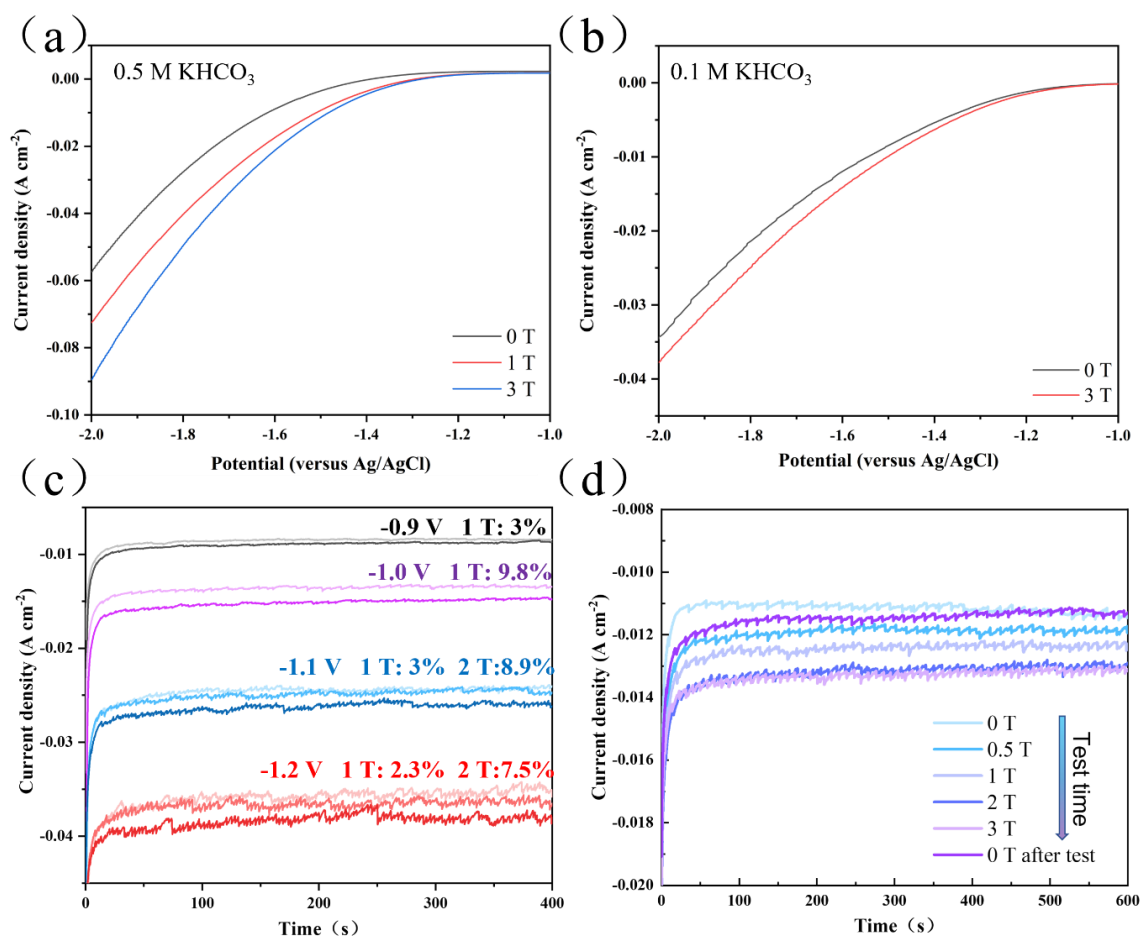

**Figure S6.** The LSV curves of  $\text{Cu}_2\text{O}$  under different magnetic fields in (a)  $0.5 \text{ M KHCO}_3$  and (b)  $0.1 \text{ M KHCO}_3$ . (c) Plot of current density vs time of  $\text{Cu}_2\text{O}$  under different magnetic fields at -0.9, -1.0, -1.1, -1.2  $\text{V}_{\text{RHE}}$ . The test was performed in  $0.1 \text{ M KHCO}_3$ . (d) Plot of current density vs time at  $1.0 \text{ V}_{\text{RHE}}$  under different magnetic fields. The test sequence is 0T-0.5T-1T-2T-3T-0T. And the test was performed in  $0.1 \text{ M KHCO}_3$ .

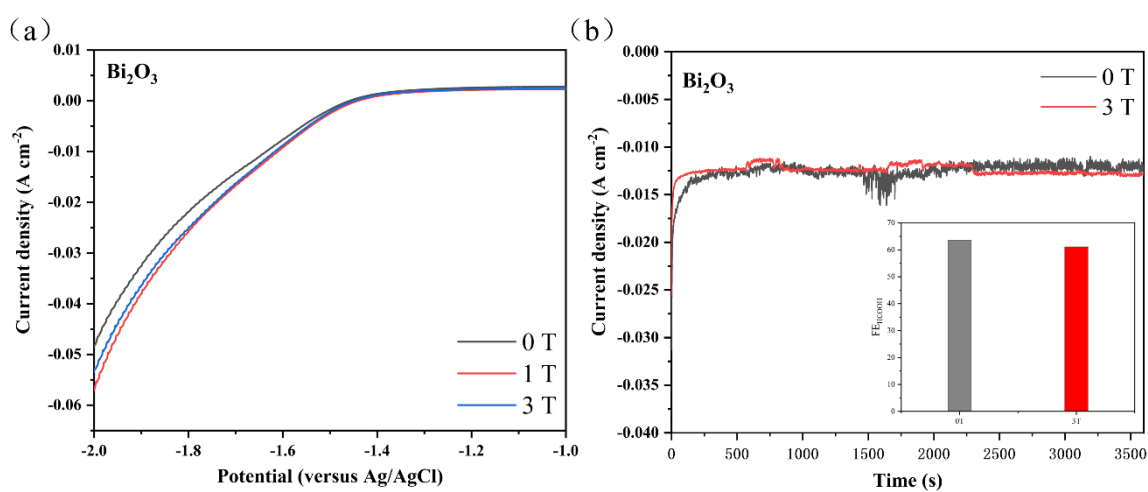

**Figure S7.** (a) LSV curves of  $\text{Bi}_2\text{O}_3$  in 0T, 1T, 3T magnetic field. (b) Plot of current density vs time at  $-1.0 \text{ V}_{\text{RHE}}$  and the FE of  $\text{HCOOH}$  in a 0 T/3 T magnetic field. All the tests were performed in  $0.5 \text{ M KHCO}_3$  solution.

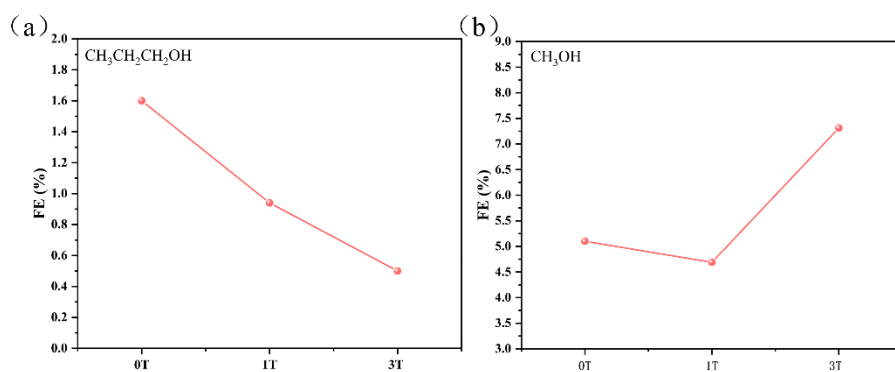

**Figure S8.** The FE of CH<sub>3</sub>CH<sub>2</sub>CH<sub>2</sub>OH and CH<sub>3</sub>OH at -1.0 V<sub>RHE</sub> under 0 T/1T/3T.

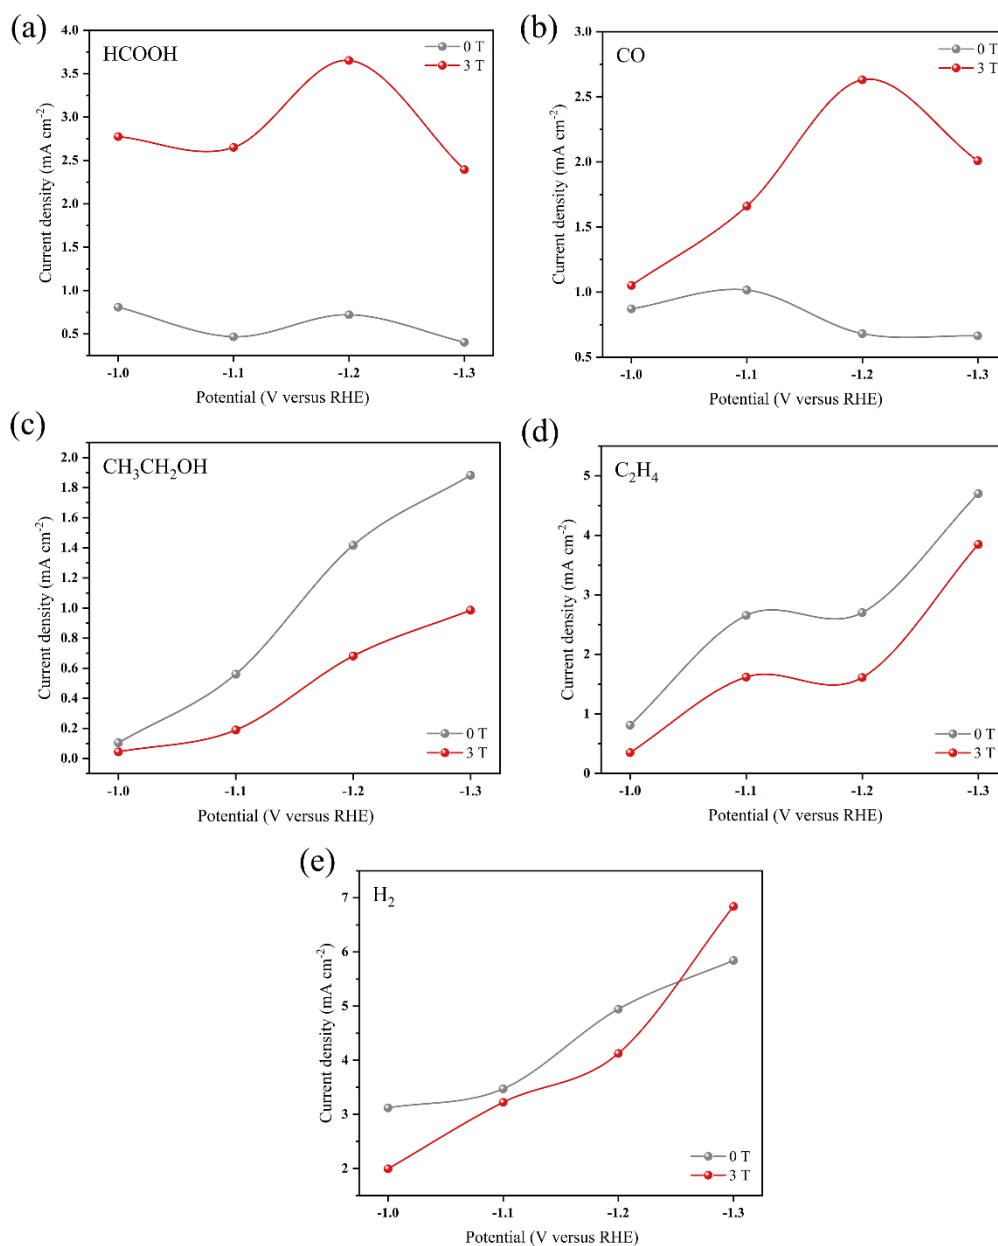

**Figure S9.** Partial current density of different products of Cu<sub>2</sub>O in 0T/3T magnetic fields: (a) HCOOH, (b)CO, (c)CH<sub>3</sub>CH<sub>2</sub>OH, (d)C<sub>2</sub>H<sub>4</sub>, (e)H<sub>2</sub>. All the tests were performed in 0.1 M KHCO<sub>3</sub> solution.

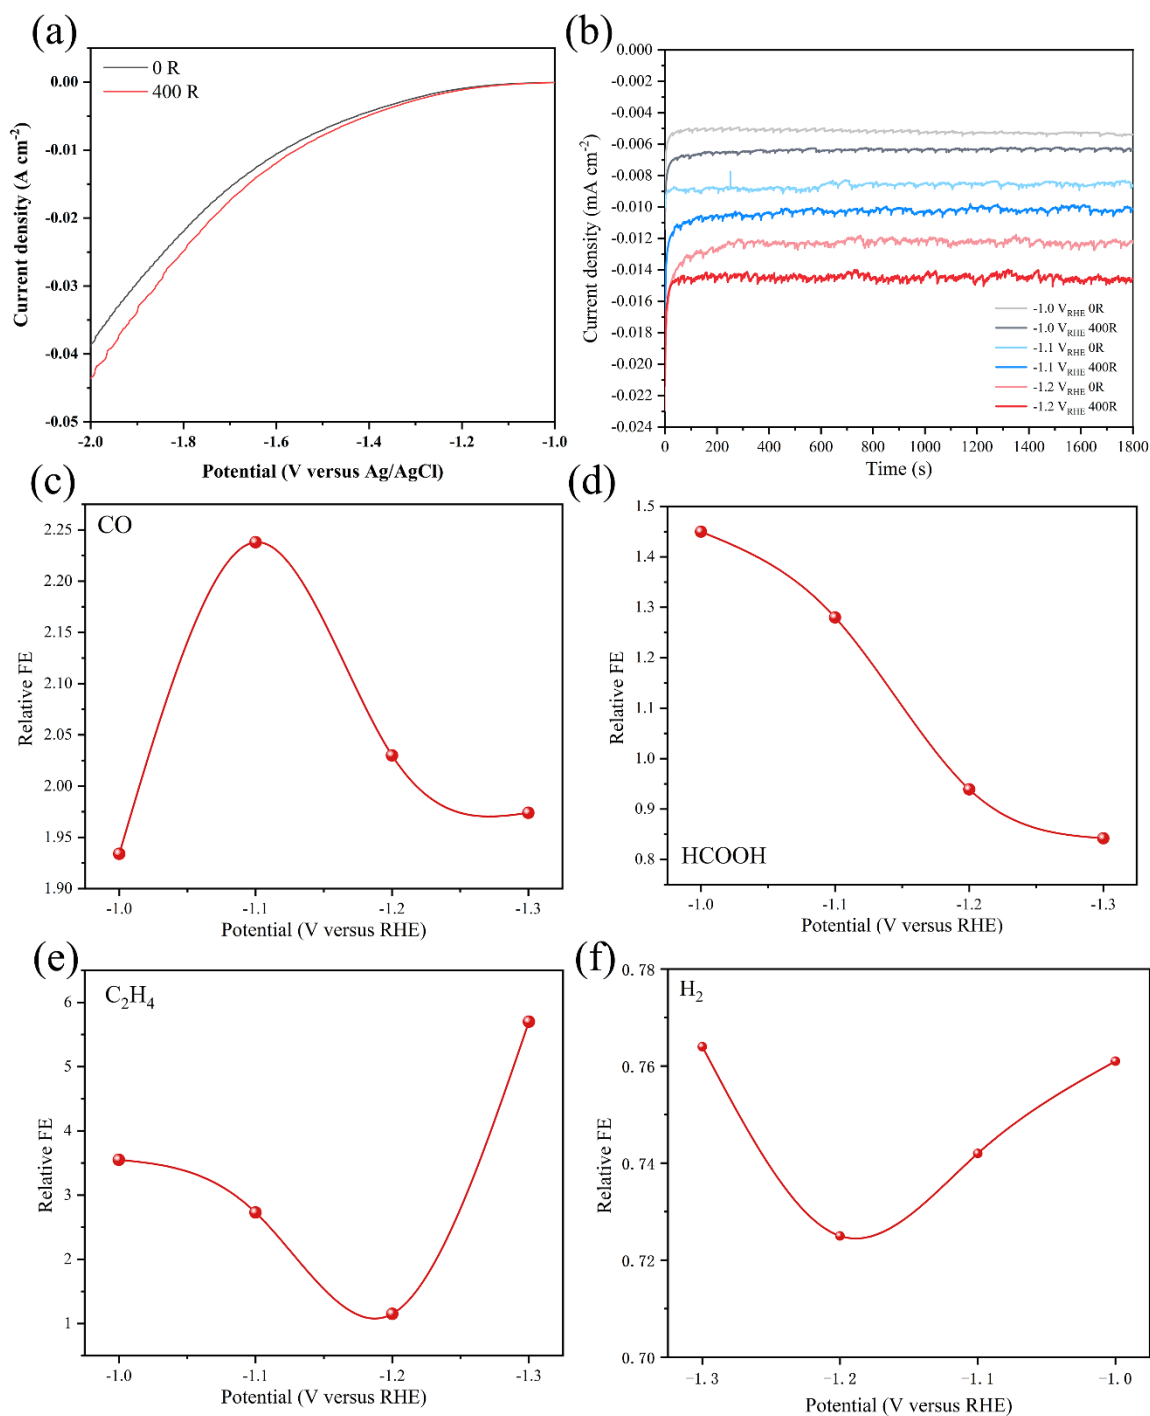

**Figure S10.** (a) The LSV curves of  $\text{Cu}_2\text{O}$  under different rotational speed, 0 R and 400 R represent the speed of the magnetic agitator is 0 RPM and 400 RPM, respectively. (b) The plot of current density vs time under 0 RPM and 400 RPM. The relative Faraday efficiency of the products between 0 RPM and 400 RPM. All the tests were performed in 0.1 M  $\text{KHCO}_3$  solution.

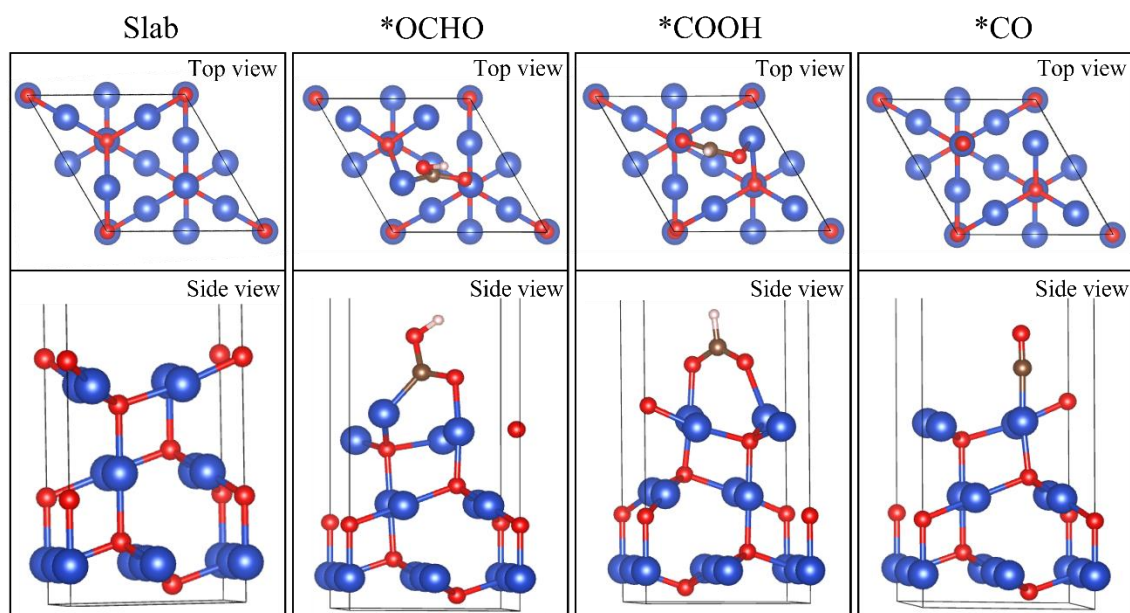

**Figure S11.** The optimized DFT models of  $\text{Cu}_2\text{O}$  (111) surfaces with different intermediates.

**Table S2.** The DFT energy, correction of zero point energy and entropy of the adsorbed and gaseous species. Here, "no mag" and "mag" represent the off and on of "LSORBIT" and "SAXIS" keywords, respectively.

|                      |        | E (eV)   | ZPE (eV) | TS (eV) |
|----------------------|--------|----------|----------|---------|
| slab                 | no mag | -78.6344 | \        | \       |
|                      | mag    | -78.8676 |          |         |
| *OCHO                | no mag | -105.684 | 0.624    | 0.198   |
|                      | mag    | -105.918 |          |         |
| *COOH                | no mag | -105.133 | 0.604    | 0.254   |
|                      | mag    | -105.367 |          |         |
| *CO                  | no mag | -95.0475 | 0.199    | 0.169   |
|                      | mag    | -95.2719 |          |         |
| $\text{CO}_2$        | no mag | -22.7714 | 0.306    | 0.662   |
|                      | mag    | -23.0207 |          |         |
| HCOOH                | no mag | -29.8894 | 0.887    | 0.726   |
|                      | mag    | -29.8896 |          |         |
| CO                   | no mag | -15.33   | 0.131    | 0.611   |
|                      | mag    | -15.43   |          |         |
| $\text{H}_2\text{O}$ | no mag | -14.1378 | 0.564    | 0.584   |
|                      | mag    | -14.2747 |          |         |
| $\text{H}_2$         | no mag | -6.7572  | 0.276    | 0.402   |
